# Supplementary material for: Dissecting the Role of the Hole-Transport Layer in Cu2 AgBiI6 Solar Cells: An Integrated Experimental and Theoretical Study
Source: PubMed Central journal article supplement (PMC11182344; doi:10.1021/acs.jpcc.4c01871), 2024-05-31
Supplement: jp4c01871_si_001.pdf [file jp4c01871_si_001.pdf]

## Supporting Information (SI)

### **Dissecting the role of hole-transport layer in Cu<sub>2</sub>AgBiI<sub>6</sub> solar cells: an integrated experimental and theoretical study**

Basheer Al-Anesi,<sup>a</sup> G. Krishnamurthy Grandhi,<sup>a</sup> Adriana Pecoraro,<sup>b</sup> Vipinraj Sugathan,<sup>a</sup> Ana Belén Muñoz-García,<sup>b</sup> Michele Pavone,<sup>c</sup> and Paola Vivo<sup>\*,a</sup>

(a) *Hybrid Solar Cells, Faculty of Engineering and Natural Sciences, P.O. Box 541, FI-33014 Tampere University, Finland.*

(b) *Department of Physics "Ettore Pancini" University of Naples Federico II, Comp. Univ. Monte Sant'Angelo 80126 Naples, Italy.*

(c) *Department of Chemical Sciences, University of Naples Federico II, Comp. Univ. Monte Sant'Angelo 80126, Naples, Italy.*

\*Corresponding author, Paola Vivo, [paola.vivo@tuni.fi](mailto:paola.vivo@tuni.fi)

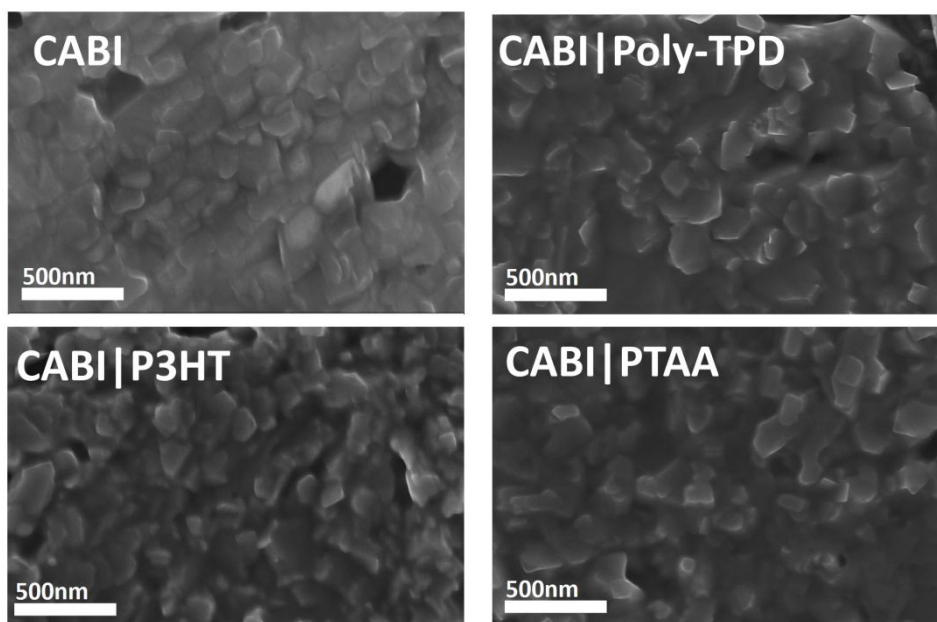

**Figure S1.** Top-view SEM images of CABI and and polymer HTLs on top of the CABI layer.

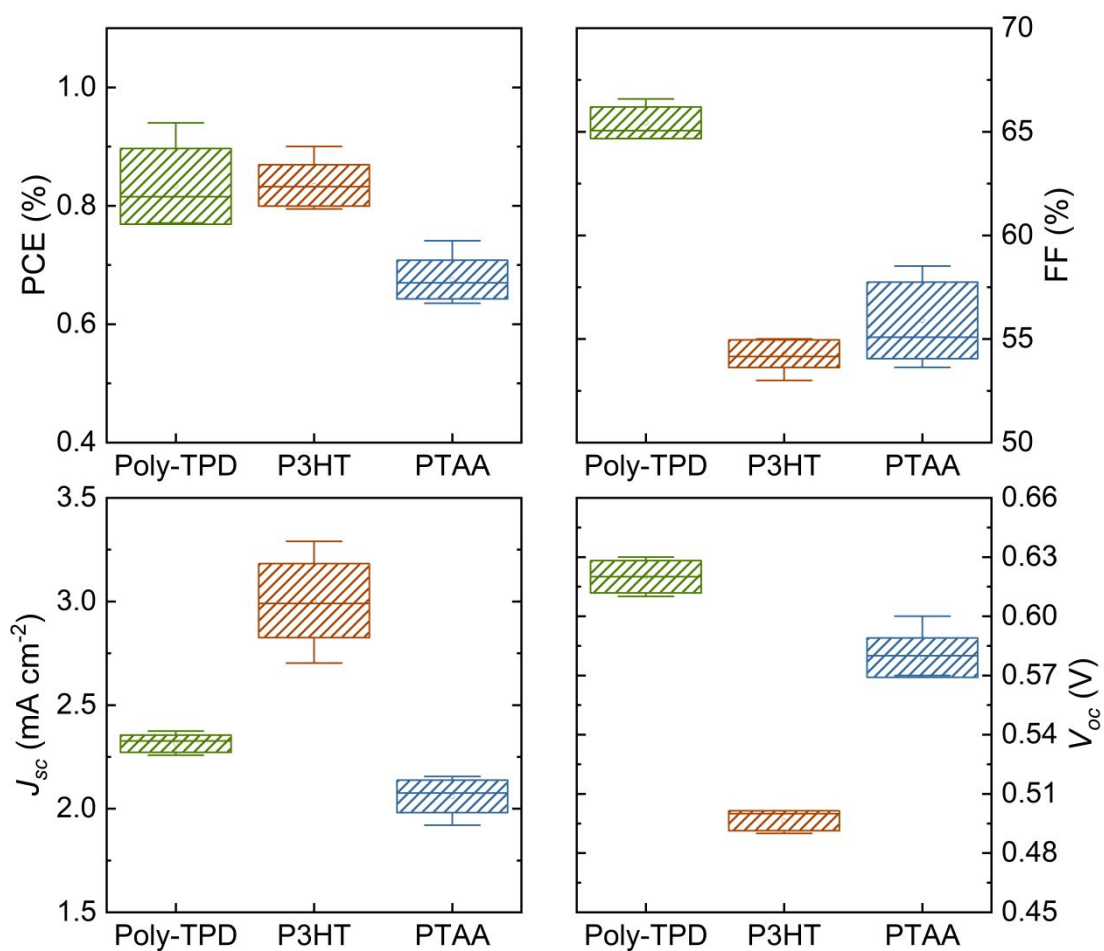

**Figure S2.** Statistical distributions of the photovoltaic parameters of the polymeric HTLs-based devices.

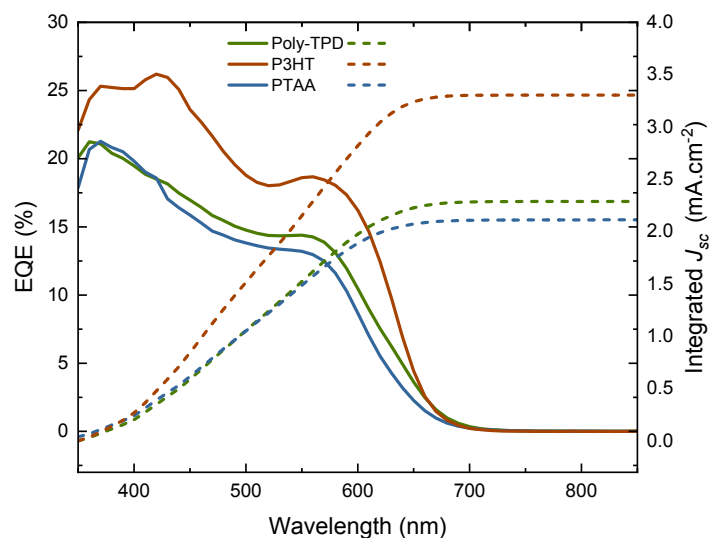

**Figure S3.** External quantum efficiency (EQE) spectra and the corresponding integrated JSC values of the best-performing polymeric HTLs-based devices.

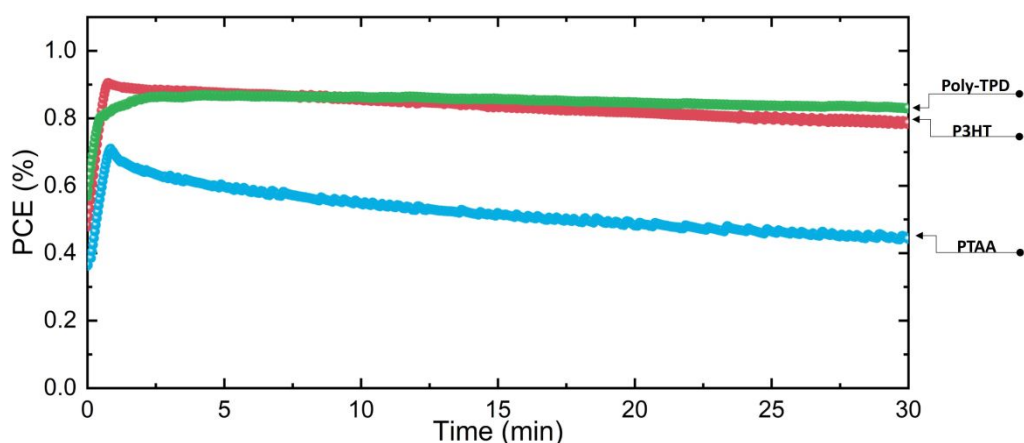

**Figure S4.** Absolute PCE values of polymeric HTLs-based devices under MPPT condition.

### Structural models

The starting point for the computational model is the CABI structure ( $R\bar{3}m$  No. 166) provided by Sansom et al.<sup>1</sup> Random distribution and partial occupation of Cu, Bi, Ag atoms and vacant sites was realized through a special quasi-random structure toolkit. The optimized bulk structure was cleaved along the stable (110) surface to realize the slab model.<sup>2</sup> A 2x1x1 supercell was considered to accommodate each HTM and a 20 Å vacuum was considered so to avoid interaction between periodic images. For the three HTMs, namely Poly-TPD, PTAA

and P3HT, a monomeric unit model has been considered. Computational models for HTMs are shown in **Figure S4**.

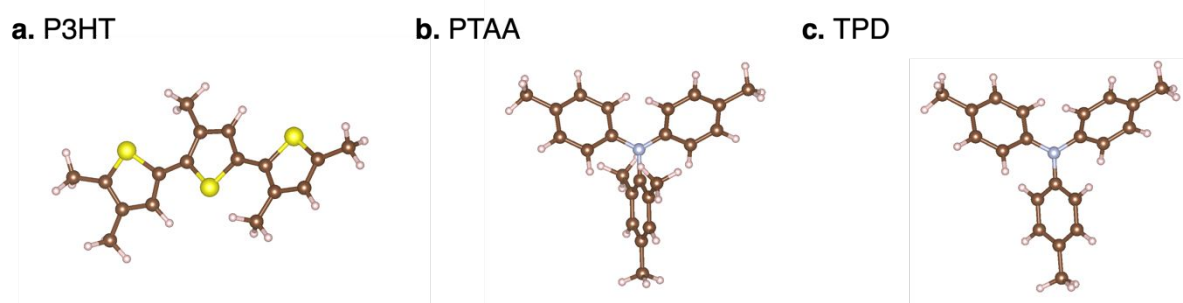

**Figure S5.** Monomeric models for P3HT, PTAA and TPD, HTMs. Color Legend for atomic spheres: C-brown; H-light pink; S-yellow; N-light blue.

## References

1. Sansom, H. C.; Longo, G.; Wright, A. D.; Buizza, L. R. V.; Mahesh, S.; Wenger, B.; Zanella, M.; Abdi-Jalebi, M.; Pitcher, M. J.; Dyer, M. S.; Manning, T. D.; Friend, R. H.; Herz, L. M.; Snaith, H. J.; Claridge, J. B.; Rosseinsky, M. J. Highly Absorbing Lead-Free Semiconductor  $\text{Cu}_2\text{AgBiI}_6$  for Photovoltaic Applications from the Quaternary  $\text{CuI-AgI-BiI}_3$  Phase Space. *J. Am. Chem. Soc.* **2021**, *143*, 3983–3992.
2. Grandhi, G. K.; Al-Anesi, B.; Pasanen, H.; Ali-Löytty, H.; Lahtonen, K.; Granroth, S.; Christian, N.; Matuhina, A.; Liu, M.; Berdin, A.; Pecunia, V.; Vivo, P.; Grandhi, G. K.; Al-Anesi, B.; Pasanen, H.; Christian, N.; Matuhina, A.; Liu, M.; Vivo, P.; Ali-Löytty, H.; Lahtonen, K.; Granroth, S.; Berdin, A. Enhancing the Microstructure of Perovskite-Inspired  $\text{Cu-Ag-Bi-I}$  Absorber for Efficient Indoor Photovoltaics. *Small* **2022**, *18*, 2203768.
